# Supplementary material for: Middle Eocene Climatic Optimum (MECO) and its imprint in the continental Escanilla Formation, Spain
Source: Copernicus journal article supplement (doi:10.5194/cp-20-935-2024), 2024-04-15
Supplement: Supplementary file 1 [file cp-20-935-2024-supplement.zip]

Archive with 7 entries (7 files):
- Stable_Isotope_Data.xlsx
- Clumped_Isotope_Thermometry.xlsx
- Sharma_et_al_Supplementary_Material.pdf
- XRF_Major_Element_Data.xlsx
- Geochemistry_Sampling_Stations.xlsx
- cp-20-935-2024-supplement-title-page.pdf
- Geochemical_Calculations.xlsx
