# Supplementary material for: Middle Eocene Climatic Optimum (MECO) and its imprint in the continental Escanilla Formation, Spain
Source: Copernicus journal article supplement (doi:10.5194/cp-20-935-2024), 2024-04-15
Supplement: Supplementary file 1 [file cp-20-935-2024-supplement.zip › cp-20-935-2024-supplement-title-page.pdf]

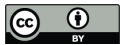

*Supplement of*

**Middle Eocene Climatic Optimum (MECO) and its imprint in the continental Escanilla Formation, Spain**

**Nikhil Sharma et al.**

*Correspondence to:* Nikhil Sharma ([nikhil.sharma@beg.utexas.edu](mailto:nikhil.sharma@beg.utexas.edu))

- [cp-20-935-2024-supplement-title-page.pdf](#)
- [Clumped\\_Isotope\\_Thermometry.xlsx](#)
- [Geochemical\\_Calculations.xlsx](#)
- [Geochemistry\\_Sampling\\_Stations.xlsx](#)
- [Sharma\\_et\\_al\\_Supplementary\\_Material.pdf](#)
- [Stable\\_Isotope\\_Data.xlsx](#)
- [XRF\\_Major\\_Element\\_Data.xlsx](#)

The copyright of individual parts of the supplement might differ from the article licence.
