# Supplementary material for: Middle Eocene Climatic Optimum (MECO) and its imprint in the continental Escanilla Formation, Spain
Source: Copernicus journal article supplement (doi:10.5194/cp-20-935-2024), 2024-04-15
Supplement: Supplementary file 1 [file cp-20-935-2024-supplement.zip › Sharma_et_al_Supplementary_Material.pdf]

### *Supplementary figures*

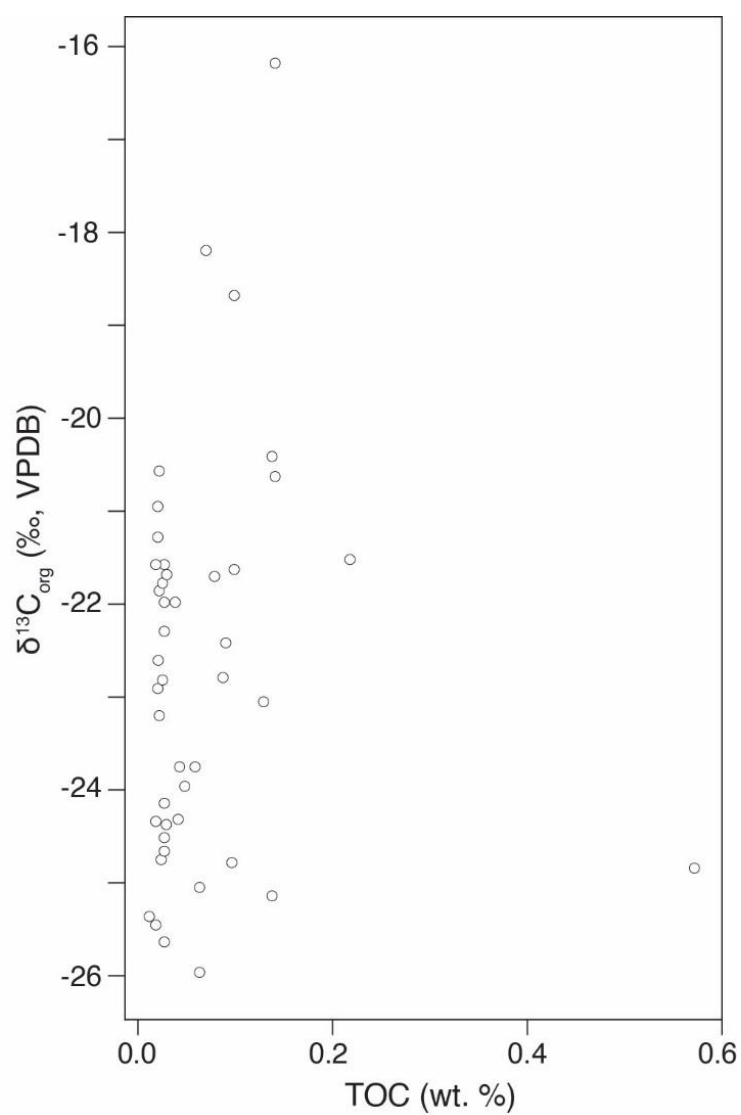

**Figure S1. Assessing relationship between organic carbon isotope and preserved organic matter.** Scatter plot between the Total Organic Carbon (TOC) and organic carbon isotope ( $\delta^{13}\text{C}_{\text{org}}$ ). No significant correlation trend is observed.

## Scanning Electron Microscope (SEM) Images

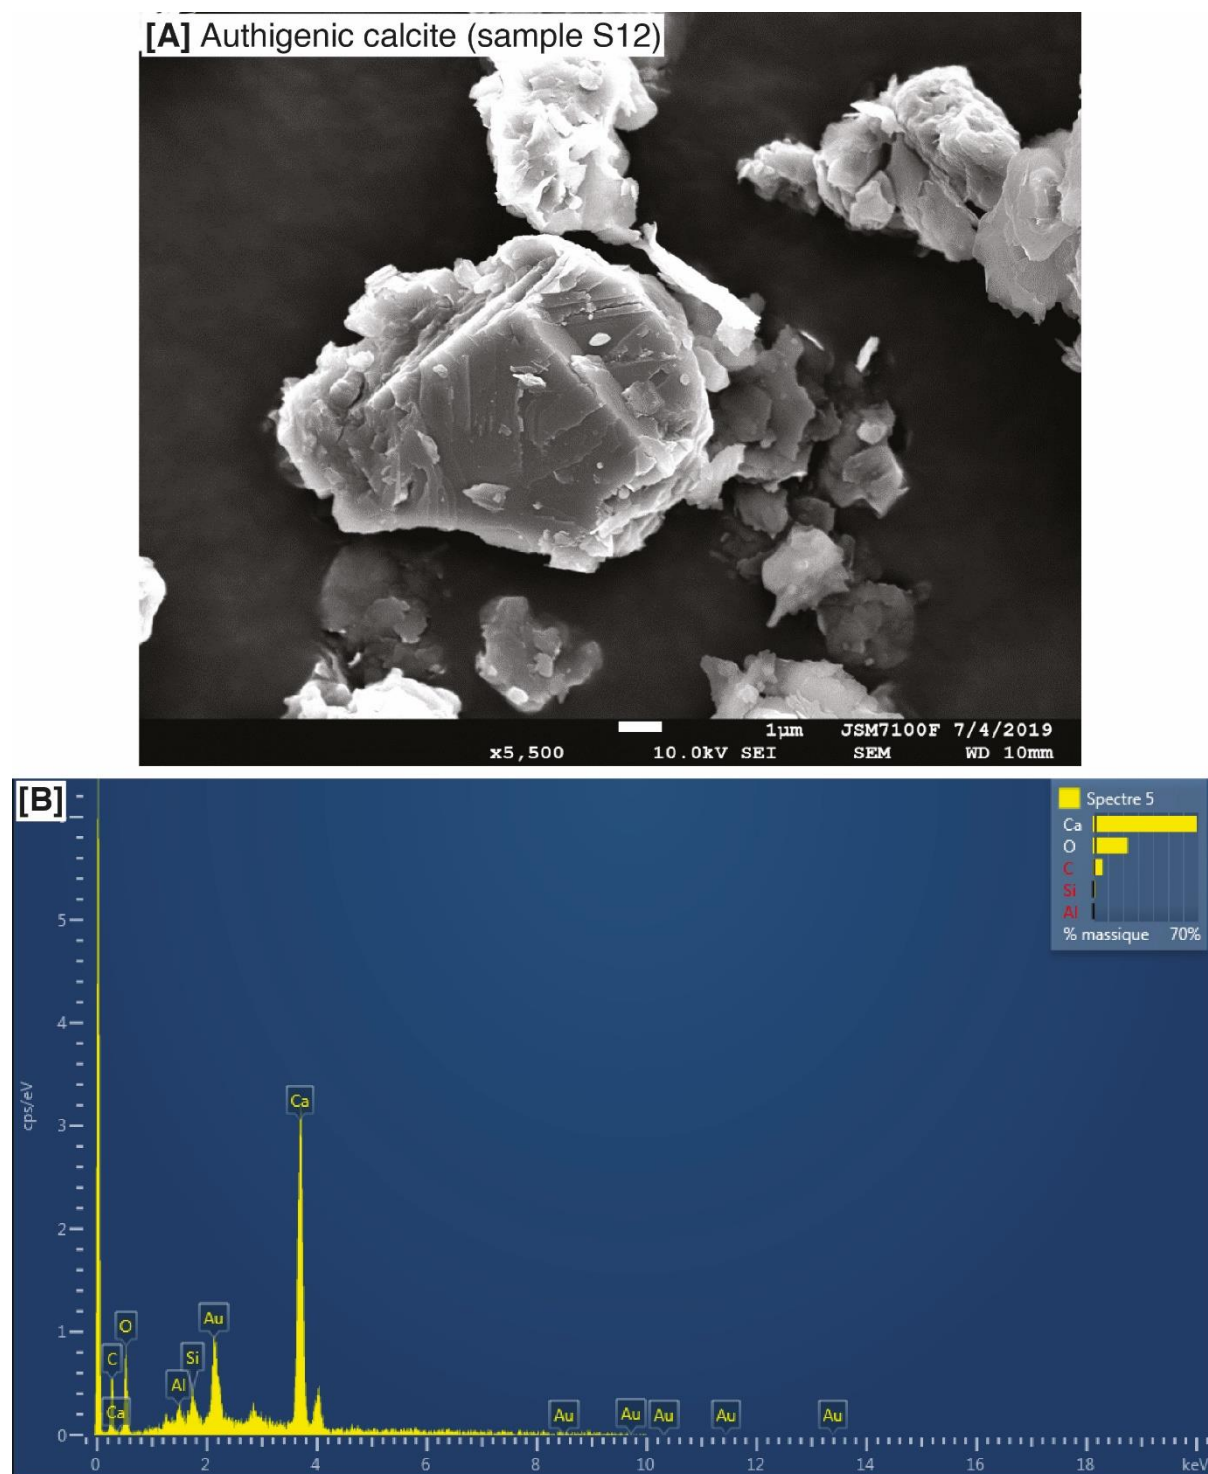

**Figure S2. SEM image.** SEM images show the presence of authigenic calcite in paleosol samples S12 along with an EDS showing the chemical composition of the identified mineral.

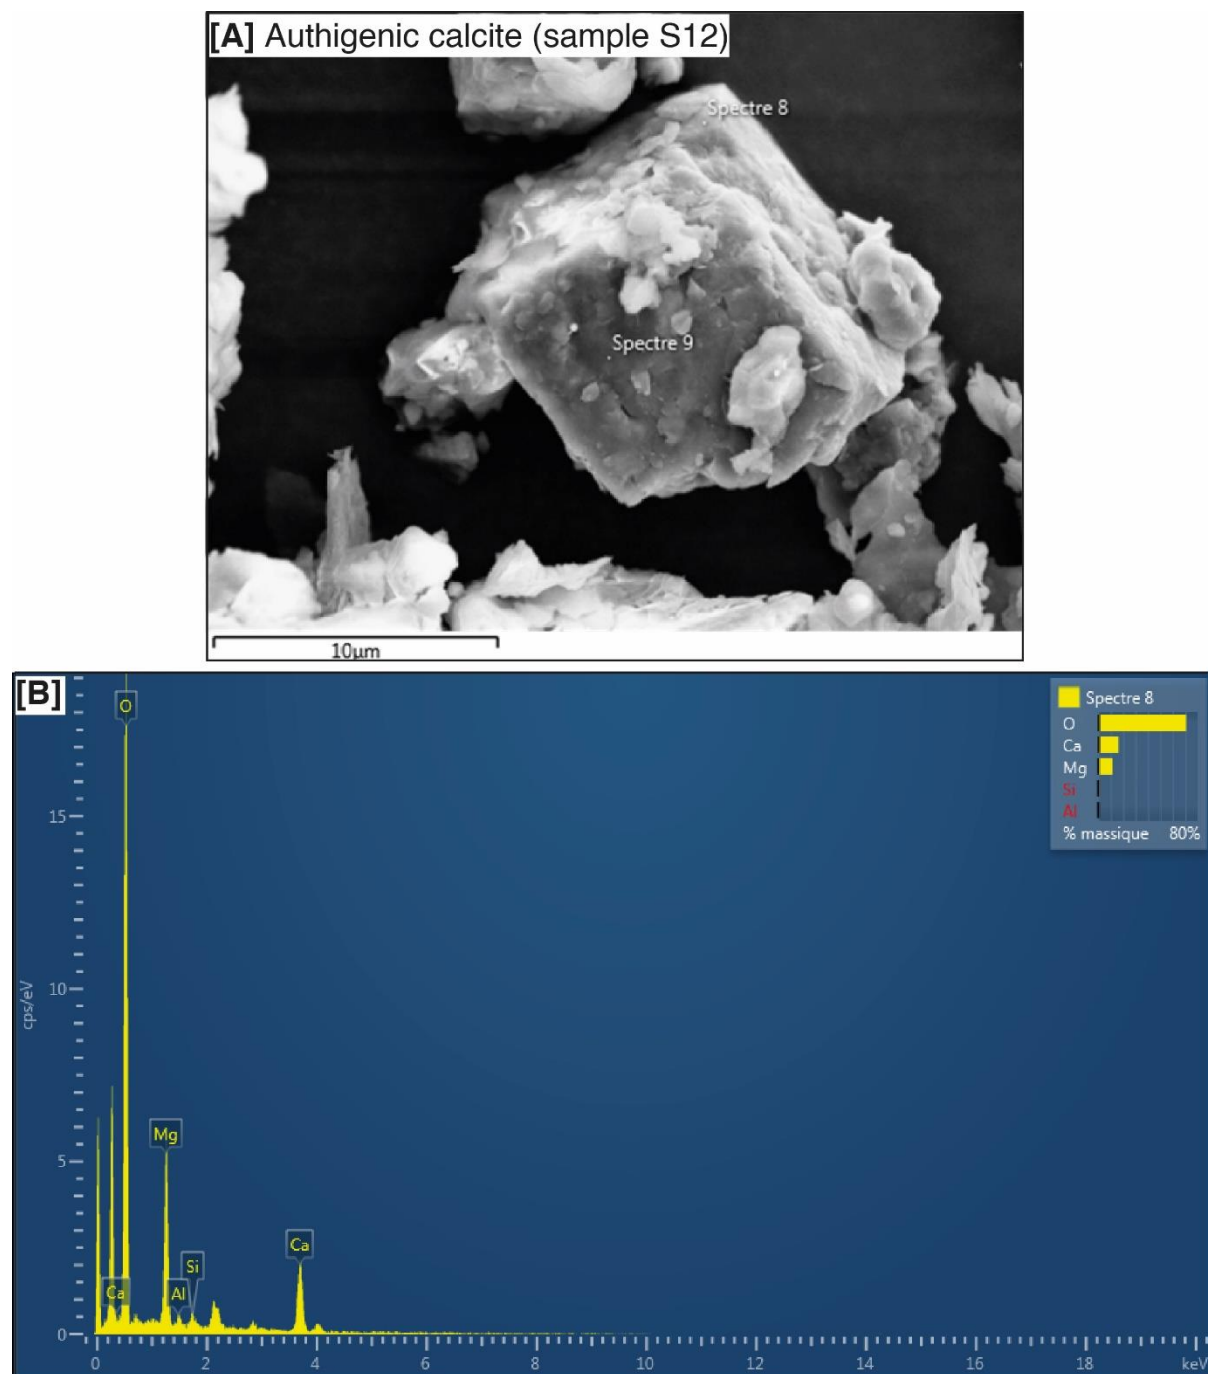

**Figure S3. SEM image.** SEM images show the presence of authigenic calcite in paleosol samples S12 along with an EDS showing the chemical composition of the identified mineral.

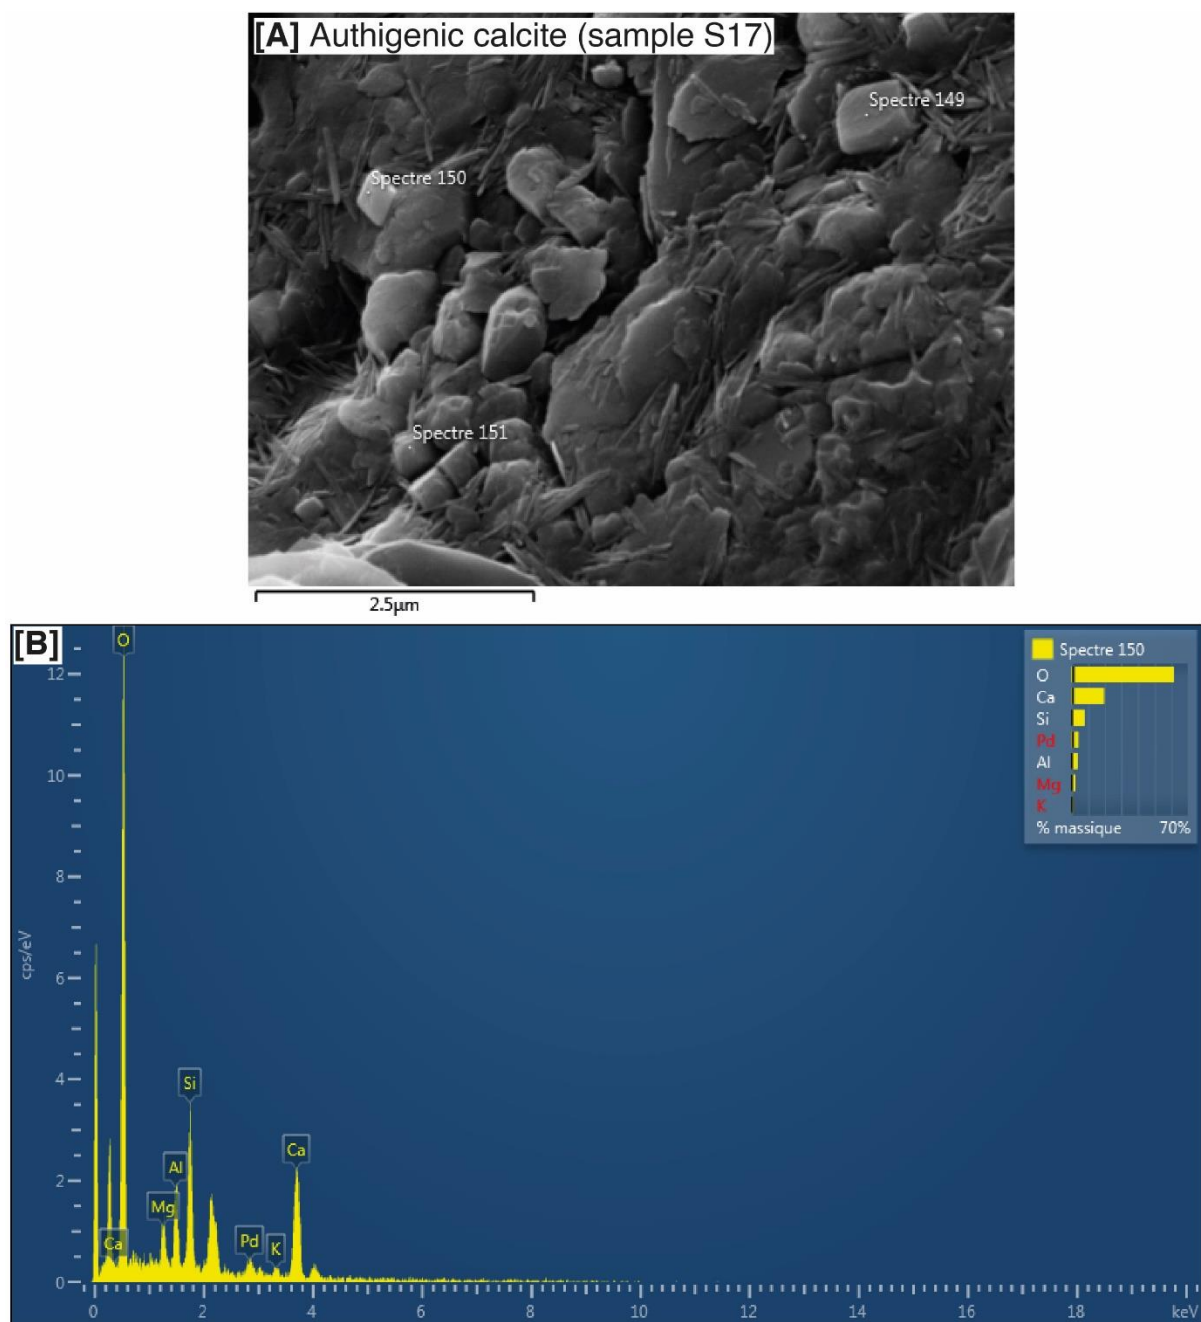

**Figure S4. SEM images.** SEM images show the presence of authigenic calcite in paleosol samples S17 along with an EDS showing the chemical composition of the identified mineral.

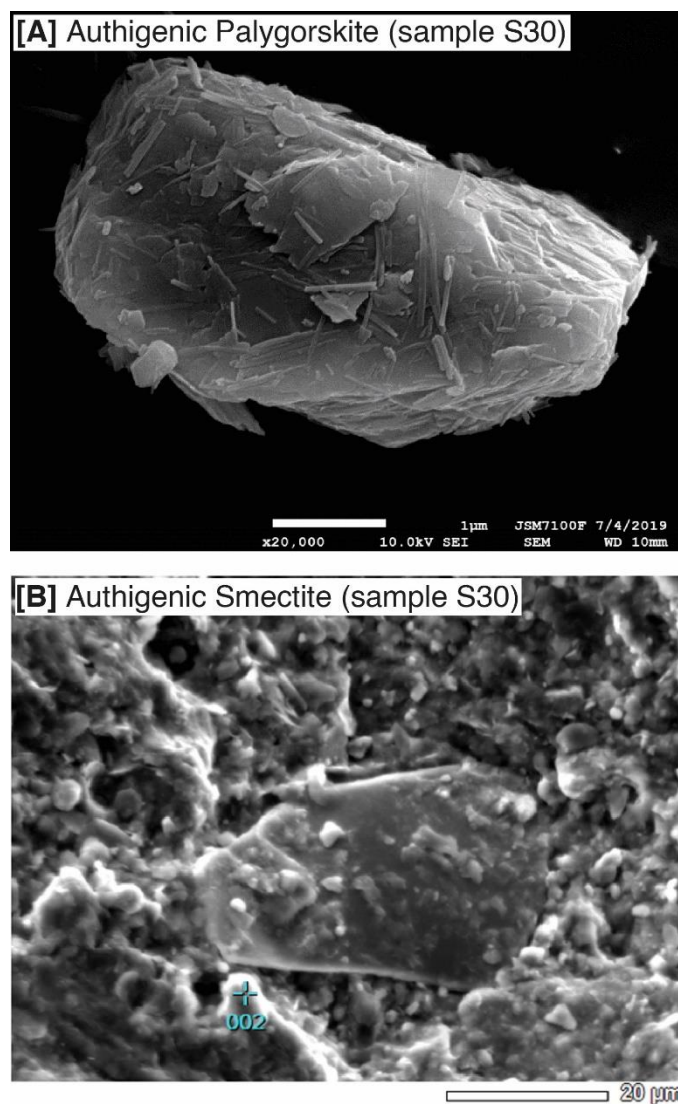

**Figure S5. SEM images.** SEM images show the presence of authigenic palygorskite and smectite in paleosol sample S30.

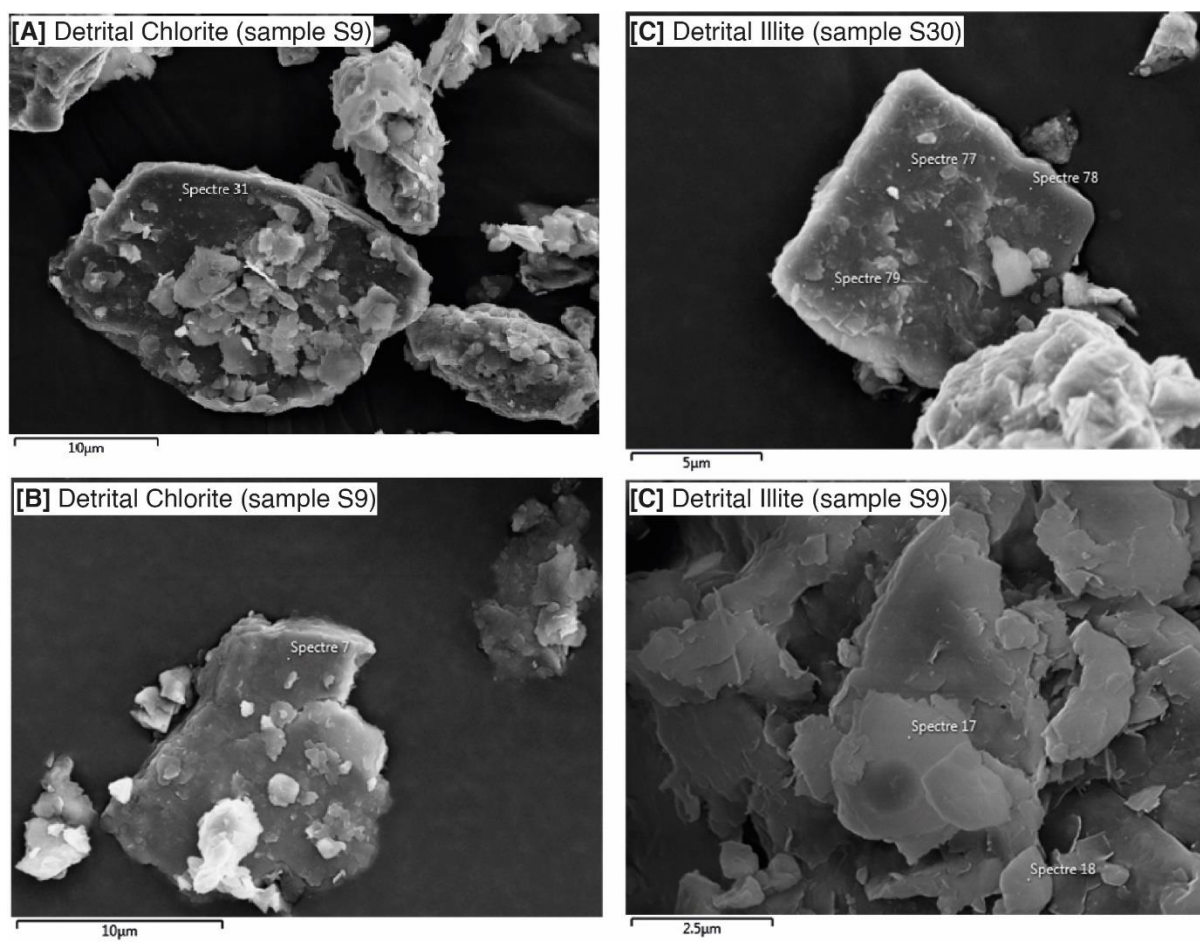

**Figure S6. SEM images.** SEM images show the presence of detrital chlorite and illite in paleosol samples S9 and S30.

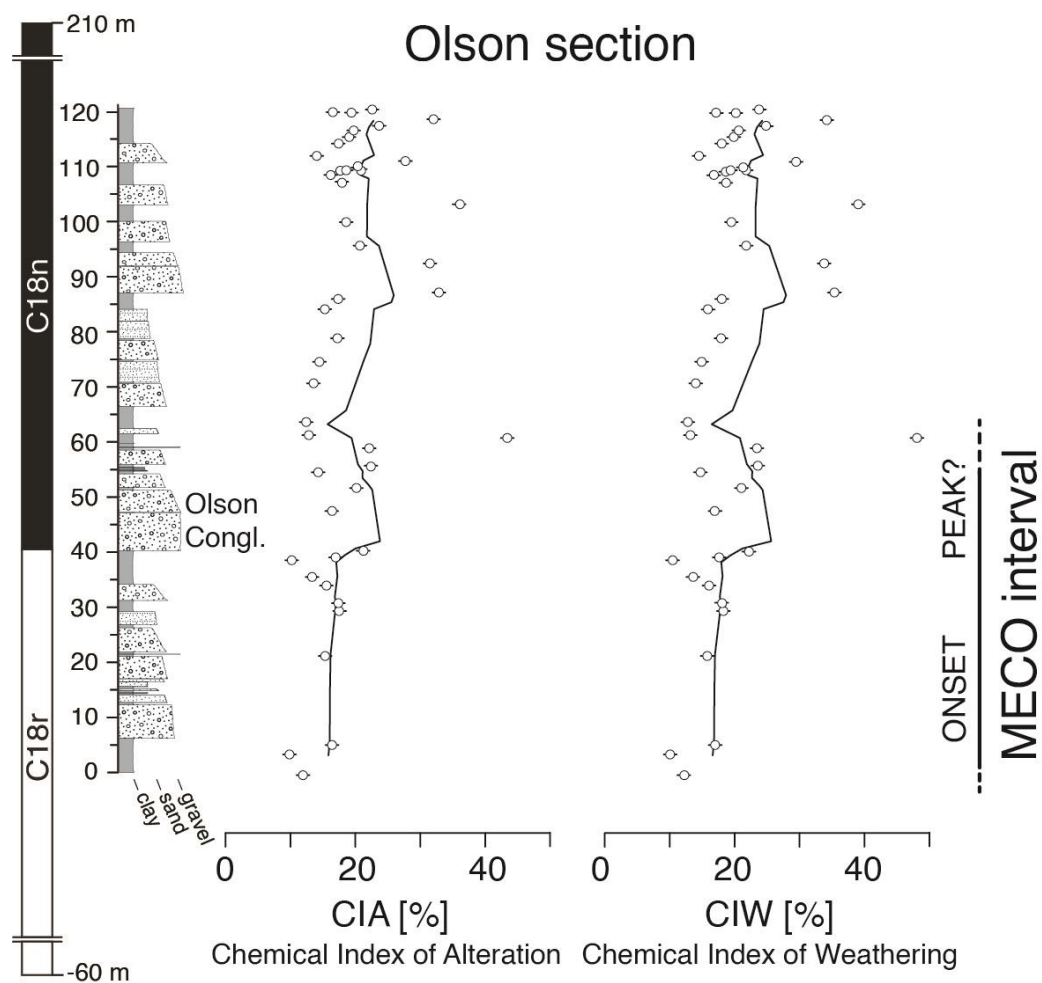

**Figure S7.** Comparison between values of the Chemical Index of Alteration (CIA) and the Chemical Index of Weathering (CIW) and associated standard error. Both datasets are displayed with a 7-point moving average to quantify chemical weathering in the Escanilla Fm at Olson.
