# Supplementary material for: Middle Eocene Climatic Optimum (MECO) and its imprint in the continental Escanilla Formation, Spain
Source: Copernicus journal article supplement (doi:10.5194/cp-20-935-2024), 2024-04-15
Supplement: Supplementary file 1 [file cp-20-935-2024-supplement.zip › Stable_Isotope_Data.xlsx]

## Sheet: TOC
Sample	Height [meters]	TOC	Cmin	CaCO3	HI	OI	Tmax
S1	0.63	0.0204697	6.61209	52.7381	47.5724	849.554	496
S2	2.5	0.021907	7.23148	57.6783	133.397	654.319	496
S3	5	0.0371466	5.69488	45.4224	78.6953	744.868	343
S4	15	0.14	6.03	48.0953	473.52	293.477	493.978
S5	20.8	0.09	5.83	46.5001	382.792	454.482	370.717
S6	30	0.1	4.63	36.9289	473.026	299.146	493.587
S7	31.25	0.07	6.1	48.6536	512.305	239.1	494.522
S8	35	0.03	5.3	42.28	124.118	606.219	295.87
S9	37.5	0.0966599	7.29767	58.2062	54.9505	287.241	370.652
S10	38.75	0.017079	5.72946	45.6982	186.988	843.177	307.609
S11	40	0.0196445	4.9921	39.817	162.907	838.022	608.565
S12	41.3	0.0266764	5.72	45.6279	73.4744	663.51	291
S13	50.6	0.0359817	5.29258	42.2136	119.081	629.456	373.478
S14	51.5	0.0146128	5.54459	44.2236	220.369	1127.55	332.435
S15	52.75	0.14	7.67	61.1893	294.202	285.116	314.304
S16	54	0.13	7.12	56.76	263.544	449.877	295.13
S17	55.25	0.137527	7.2217	57.6003	214.921	469.677	312.87
S18	60	0.0994776	5.7099	45.5421	287.232	468.64	502.609
S19	62.5	0.217748	4.60415	36.7227	375.82	508.377	324.261
S20	65	0.571997	6.61453	52.7575	84.4147	130.981	428
S21	74	0.140132	6.69176	53.3735	402.834	207.083	501.652
S22	77.1	0.08	5.62	44.82	51.0295	219.52	313.348
S23	83.35	0.0202674	6.00819	47.92	48.0938	759.133	497
S24	84.6	0.0875133	5.72358	45.65	49.4684	200.271	334.261
S25	85.85	0.0226029	3.39557	27.0831	129.498	864.536	496
S26	86.5	0.0280612	3.54953	28.3111	139.124	1027.15	345
S27	94.8	0.0241492	5.06886	40.4293	121.284	767.962	496
S28	96.5	0.0244755	5.26043	41.9572	39.902	1053.33	495
S29	102	0.0262682	3.02863	24.1563	111.572	1178.79	355
S30	107	0.0257454	5.28359	42.142	113.875	842.659	497
S31	107.6	0.0213136	5.9073	47.1166	45.8658	1067.3	496
S32	108.22	0.0223539	5.51358	43.9763	43.7453	787.048	496
S33	108.5	0.0258986	5.5011	43.8768	75.5403	919.908	346
S34	108.7	0.0277856	5.28549	42.1571	70.4326	858.194	497
S35	109	0.0292761	5.03285	40.142	33.4341	744.337	353
S36	110.25	0.0472563	4.17928	33.334	62.159	879.121	386
S37	111.25	0.06	6.59468	52.5992	124.589	826.442	365
S38	115	0.0627023	5.68952	45.3796	62.5026	647.141	376
S39	116.25	0.039866	5.03422	40.153	48.9227	953.168	331
S40	117.5	0.0598453	5.3393	42.5862	81.5325	653.401	453
S41	118.4	0.0302908	4.85429	38.7178	96.7184	782.885	318
S42	119.65	0.0312777	3.29385	26.2717	62.4886	792.7	496
S43	120.9	0.0230489	5.45398	43.501	42.429	853.27	497
S44	121	0.0228075	5.66713	45.201	42.9084	909.462	321
S45	121.5	0.0435649	4.69345	37.4349	89.9186	763.296	473

## Sheet: d13Corg
Sample	Height [meters]	d13Corg [‰ VPDB]
S1	0.63	-20.9483
S2	2.5	-20.57
S3	5	-21.9788
S4	15	NaN
S5	20.8	-22.42
S6	30	NaN
S7	31.25	NaN
S8	35	-21.9648
S9	37.5	-24.7796
S10	38.75	-25.458
S11	40	-21.2762
S12	41.3	-25.6292
S13	50.6	-24.3338
S14	51.5	-25.3934
S15	52.75	-20.4074
S16	54	-23.0501
S17	55.25	-25.1363
S18	60	-21.6345
S19	62.5	-21.5155
S20	65	-24.8358
S21	74	-20.6093
S22	77.1	-21.6962
S23	83.35	-22.63
S24	84.6	-22.7939
S25	85.85	-21.59
S26	86.5	-22.28
S27	94.8	-21.85
S28	96.5	-21.5755
S29	102	-24.1722
S30	107	-22.8144
S31	107.6	-24.3407
S32	108.22	-23.203
S33	108.5	-21.7691
S34	108.7	-24.49
S35	109	-21.66
S36	110.25	-23.9485
S37	111.25	-26
S38	115	-25.0474
S39	116.25	-24.3315
S40	117.5	-23.7302
S41	118.4	-24.6395
S42	119.65	-24.4068
S43	120.9	-24.7464
S44	121	-22.8989
S45	121.5	-23.7626

## Sheet: d18Ocarb
Sample	Height [meters]	d18Ocarb [‰ VPDB]
S1	0.63	-5.41029
S2	2.5	-5.54633
S3	5	-5.86479
S4	15	NaN
S5	20.8	-5.43805
S6	30	NaN
S7	31.25	NaN
S8	35	-5.6
S9	37.5	-6.7
S10	38.75	-6.05319
S11	40	NaN
S12	41.3	-5.83978
S13	50.6	-6.13943
S14	51.5	NaN
S15	52.75	NaN
S16	54	-4.2
S17	55.25	-6.35
S18	60	-5.77601
S19	62.5	NaN
S20	65	NaN
S21	74	NaN
S22	77.1	-6.07135
S23	83.35	-5.91747
S24	84.6	-5.50861
S25	85.85	-6.14402
S26	86.5	-5.87804
S27	94.8	-5.91961
S28	96.5	-5.98918
S29	102	-5.74777
S30	107	-6.03481
S31	107.6	-6.18356
S32	108.22	-6.03758
S33	108.5	-6.32793
S34	108.7	-6.25281
S35	109	-6.04859
S36	110.25	-5.73591
S37	111.25	NaN
S38	115	-5.76508
S39	116.25	-6.17886
S40	117.5	-5.75301
S41	118.4	-6.16379
S42	119.65	-5.96641
S43	120.9	-5.69616
S44	121	-5.74168
S45	121.5	-5.95477

## Sheet: d13Ccarb
Sample	Height [meters]	d13Ccarb [‰ VPDB]
S1	0.63	-1.64241
S2	2.5	-1.15519
S3	5	-1.86443
S4	15	NaN
S5	20.8	-1.38002
S6	30	NaN
S7	31.25	NaN
S8	35	-2
S9	37.5	-2.6
S10	38.75	-1.26123
S11	40	NaN
S12	41.3	-1.27963
S13	50.6	-1.96818
S14	51.5	NaN
S15	52.75	NaN
S16	54	-2.52
S17	55.25	-2.49
S18	60	-1.34754
S19	62.5	NaN
S20	65	NaN
S21	74	NaN
S22	77.1	-1.90721
S23	83.35	-1.08984
S24	84.6	-1.24193
S25	85.85	-1.37642
S26	86.5	-1.42864
S27	94.8	-1.62968
S28	96.5	-1.1733
S29	102	-1.34369
S30	107	-2.1911
S31	107.6	-1.31485
S32	108.22	-1.16932
S33	108.5	-1.45272
S34	108.7	-1.56363
S35	109	-1.04329
S36	110.25	-1.74288
S37	111.25	NaN
S38	115	-1.08258
S39	116.25	-1.47898
S40	117.5	-1.35295
S41	118.4	-1.91308
S42	119.65	-1.86911
S43	120.9	-2.17698
S44	121	-1.9832
S45	121.5	-1.05582

## Sheet: d13C_d18O
d13Ccarb	d18O_carb
-1.64241	-5.41029
-1.15519	-5.54633
-1.86443	-5.86479
-1.38002	-5.43805
-2	-5.6
-2.6	-6.7
-1.26123	-6.05319
-1.27963	-5.83978
-1.96818	-6.13943
-2.52	-4.2
-2.49	-6.35
-1.34754	-5.77601
-1.90721	-6.07135
-1.08984	-5.91747
-1.24193	-5.50861
-1.37642	-6.14402
-1.42864	-5.87804
-1.62968	-5.91961
-1.1733	-5.98918
-1.34369	-5.74777
-2.1911	-6.03481
-1.31485	-6.18356
-1.16932	-6.03758
-1.45272	-6.32793
-1.56363	-6.25281
-1.04329	-6.04859
-1.74288	-5.73591
-1.08258	-5.76508
-1.47898	-6.17886
-1.35295	-5.75301
-1.91308	-6.16379
-1.86911	-5.96641
-2.17698	-5.69616
-1.9832	-5.74168
-1.05582	-5.95477

## Sheet: d13C_d13Corg
d13Ccarb	d13Corg
-1.64241	-20.9483
-1.15519	-20.57
-1.86443	-21.9788
-1.38002	-22.42
-2	-21.9648
-2.6	-24.7796
-1.26123	-25.458
-1.27963	-25.6292
-1.96818	-24.3338
-2.52	-23.0501
-2.49	-25.1363
-1.34754	-21.6345
-1.90721	-21.6962
-1.08984	-22.63
-1.24193	-22.7939
-1.37642	-21.59
-1.42864	-22.28
-1.62968	-21.85
-1.1733	-21.5755
-1.34369	-24.1722
-2.1911	-22.8144
-1.31485	-24.3407
-1.16932	-23.203
-1.45272	-21.7691
-1.56363	-24.49
-1.04329	-21.66
-1.74288	-23.9485
-1.08258	-25.0474
-1.47898	-24.3315
-1.35295	-23.7302
-1.91308	-24.6395
-1.86911	-24.4068
-2.17698	-24.7464
-1.9832	-22.8989
-1.05582	-23.7626

## Sheet: Stromatolite Nodule d18Ocarb
Sample	Height [meters]	d18Ocarb [‰ VPDB]
NS1	13	[-6.57; -6.68; -6.79; -7.11; -7.21; -6.80; -6.89; -6.89; -6.84]
NS2	30	[-6.72; -6.72; -6.72; -6.96; -7.06; -7.03]
NS3	31.25	[-6.98; -7.20; -7.17; -7.18; -7.76; -7.75]
NS4	77.2	[-7.81; -7.35; -7.28; -7.46; -7.49; -7.50; -7.36; -7.70]
NS5	84.6	[-7.72; -7.85; -7.77; -7.35; -7.40; -8.10; -8.10; -7.94]
NS6	86.5	[-6.56; -6.72; -6.99; -7.46; -7.53; -7.44; -7.59]
NS7	96.5	[-7.07; -7.04; -6.77; -5.79; -7.21]
NS8	101.3	[-6.74; -6.68; -6.96; -6.96; -7.28; -7.15]
NS9	117.5	[-5.78; -4.70; -5.38; -7.61; -7.78; -7.67; -6.41; -6.39]
NN1	52	[-7.53; -7.53; -7.57; -7.57; -7.48; -7.61; -7.54; -7.57; -7.61]
NN2	65	[-6.56; -6.51; -6.56; -6.60; -6.55; -6.57; -6.53; -6.56; -6.60; -6.56]
NN3	115	[-6.88; -6.65; -7.01; -6.98; -6.81; -6.90; -6.84; -6.94; -7.11; -6.92]

## Sheet: Stromatolite Nodule d13Ccarb
Sample	Height [meters]	d13Ccarb [‰ VPDB]
NS1	13	[-2.58; -2.59; -2.75; -2.88; -2.47; -2.49; -2.74; -2.81; -2.77; -2.67]
NS2	30	[-3.43; -3.94; -3.61; -3.62; -3.66; -3.68]
NS3	31.25	[-3.30; -3.54; -3.27; -3.48; -2.32; -2.35]
NS4	77.2	[-1.84; -1.66; -2.38; -2.08; -2.27; -2.28; -2.29; -2.30]
NS5	84.6	[-2.22; -2.26; -2.24; -1.79; -1.76; -2.22; -2.24; -2.16]
NS6	86.5	[-1.91; -2.18; -2.28; -2.85; -2.88; -2.88; -2.87]
NS7	96.5	[-2.58; -2.65; -2.17; -2.71]
NS8	101.3	[-1.99; -1.94; -2.10; -2.08; -2.03; -1.94; -1.94; -1.97]
NS9	117.5	[-1.92; -1.82; -1.37; -2.55; -2.18; -2.15]
NN1	52	[-3.97; -4.25; -4.24; -3.95; -4.25; -4.26; -3.97; -4.26; -4.28]
NN2	65	[-1.15; -1.13; -1.16; -1.15; -1.14; -1.16; -1.15; -1.12; -1.17; -1.13]
NN3	115	[-4.35; -4.37; -4.86; -4.36; -4.37; -4.80; -4.35; -4.50; -4.91; -4.35]
